# Supplementary material for: Patterns of Telemedicine Use and Glycemic Outcomes of Endocrinology Care for Patients With Type 2 Diabetes
Source: PubMed Central journal article supplement (PMC10701613; doi:10.1001/jamanetworkopen.2023.46305), 2023-12-06
Supplement: jamanetwopen-e2346305-s001.pdf [file jamanetwopen-e2346305-s001.pdf]

## Supplemental Online Content

Zupa MF, Vimalananda VG, Rothenberger SD, et al. Patterns of telemedicine use and glycemic outcomes of endocrinology care for type 2 diabetes. *JAMA Netw Open*. 2023;6(12):e2346305. doi:10.1001/jamanetworkopen.2023.46305

**eTable 1.** *ICD-10* Codes Used to Identify Comorbid Conditions

**eTable 2.** Characteristics of Modeled vs Excluded Patients According to Presence of Follow-Up HbA<sub>1c</sub>

**eTable 3.** Supplemental Analysis: Adjusted Difference HbA<sub>1c</sub> Change for Each Care Modality Cohort by Insulin Use

This supplemental material has been provided by the authors to give readers additional information about their work.

**eTable 1. ICD-10 Codes Used to Identify Comorbid Conditions<sup>a</sup>**

|                                |                                                                                      |
|--------------------------------|--------------------------------------------------------------------------------------|
| Cardiovascular                 |                                                                                      |
| Coronary artery disease        | I20.X, I21.X, I22.X, I23.X, I24.X, I25.X                                             |
| Congestive heart failure       | I50.X, I42.X, I110.X, J19.X                                                          |
| Arrhythmia                     | I47.X, I48.X, I49.X                                                                  |
| Cerebrovascular disease        | I60.X, I61.X, I62.X, I63.X, I64.X, I65.X, I66.X, I67.X, I68.X, I69.X, DG45.X, DG46.X |
| Vascular disease               | I70.X, I71.X, I72.X, I73.X, I74.X, I75.X, I76.X, I77.X, I78.X, I79.X                 |
| Gangrene                       | I96.X, E11.5X                                                                        |
| Psychologic                    |                                                                                      |
| Psychotic disorders            | F20.X, F21.X, F22.X, F23.X, F24.X, F25.X, F28.X, F29.X                               |
| Mood disorders                 | F30.X, F31.X, F32.X, F33.X, F34.X, F39.X                                             |
| Post Traumatic Stress Disorder | F43.X                                                                                |
| Anxiety disorders              | F40.X, F41.X                                                                         |
| Alcohol use disorder           | F10.X                                                                                |
| Substance use disorder         | F11.X, F12.X, F13.X, F14.X, F15.X, F16.X, F18.X, F19.X                               |

a. Based on prior work by Pentakota et al<sup>25</sup>

**eTable 2. Characteristics of Modeled vs Excluded Patients According to Presence of Follow-Up HbA<sub>1c</sub>**

| Characteristic                                                          | Total (N=4,275) | Included (N=3,778) | Excluded (N=497) | P-Value <sup>a</sup> |
|-------------------------------------------------------------------------|-----------------|--------------------|------------------|----------------------|
| Age (years); Mean (SD)                                                  | 59.4 (13.3)     | 60.3 (12.7)        | 52.8 (15.8)      | <0.001               |
| Gender                                                                  |                 |                    |                  | <0.001               |
| Female N (%)                                                            | 2,547 (60%)     | 2,201 (58%)        | 346 (70%)        |                      |
| Male N (%)                                                              | 1,728 (40%)     | 1,577 (42%)        | 151 (30%)        |                      |
| Race N (%)                                                              |                 |                    |                  | 0.02                 |
| White                                                                   | 3,759 (88%)     | 3,332 (88%)        | 427 (86%)        |                      |
| Black                                                                   | 347 (8%)        | 300 (8%)           | 47 (9%)          |                      |
| Asian                                                                   | 87 (2%)         | 81 (2%)            | 6 (1%)           |                      |
| Other/Missing                                                           | 82 (2%)         | 65 (1%)            | 17 (3%)          |                      |
| Hispanic or Latino N (%)                                                | 78 (2%)         | 66 (2%)            | 12 (2%)          | <0.001               |
| Not specified/missing                                                   | 197 (5%)        | 158 (4%)           | 39 (8%)          |                      |
| SDI Score; Mean (SD)                                                    | 40.7 (24.0)     | 40.5 (23.9)        | 41.5 (25.0)      | 0.40                 |
| RUCA; N (%)                                                             |                 |                    |                  | 0.02                 |
| Urban                                                                   | 3,024 (71%)     | 2,645 (70%)        | 379 (76%)        |                      |
| Suburban                                                                | 921 (22%)       | 836 (22%)          | 85 (17%)         |                      |
| Rural                                                                   | 330 (8%)        | 297 (8%)           | 33 (7%)          |                      |
| HbA <sub>1c</sub> (%); Mean (SD)                                        | 7.5 (1.8)       | 7.6 (1.7)          | 7.2 (2.1)        | <0.001               |
| Insulin N (%)                                                           |                 |                    |                  | <0.001               |
| No insulin                                                              | 1,763 (41%)     | 1,476 (39%)        | 287 (58%)        |                      |
| Basal only                                                              | 703 (16%)       | 652 (17%)          | 51 (10%)         |                      |
| MDI                                                                     | 1,809 (42%)     | 1,650 (44%)        | 159 (32%)        |                      |
| Non-insulin med count; Mean (SD)                                        | 1.8 (1.1)       | 1.9 (1.1)          | 1.5 (1.0)        | <0.001               |
| BMI categorized; N (%)                                                  |                 |                    |                  | <0.001               |
| 18.5-24.9                                                               | 217 (5%)        | 196 (5%)           | 21 (4%)          |                      |
| 25-29.9                                                                 | 693 (16%)       | 639 (17%)          | 54 (11%)         |                      |
| 30-34.9                                                                 | 965 (23%)       | 880 (23%)          | 85 (17%)         |                      |
| 35-39.9                                                                 | 757 (18%)       | 688 (18%)          | 69 (14%)         |                      |
| ≥40                                                                     | 867 (20%)       | 770 (20%)          | 97 (20%)         |                      |
| Missing                                                                 | 776 (18%)       | 605 (16%)          | 171 (34%)        |                      |
| Comorbid conditions N (%)                                               |                 |                    |                  | <0.001               |
| Macrovascular                                                           | 1,526 (36%)     | 1,393 (37%)        | 133 (27%)        |                      |
| Psychologic                                                             | 1,413 (33%)     | 1,246 (33%)        | 167 (34%)        | 0.78                 |
| Appointments/12 months; Mean (SD)                                       | 2.5 (1.0)       | 2.6 (1.0)          | 1.7 (0.7)        | <0.001               |
| Number of follow-up HbA <sub>1c</sub> test results/12 months; Mean (SD) | 1.5 (0.9)       | 1.7 (0.8)          | 0 (0.0)          | <0.001               |

a. For continuous variables, Kruskal-Wallis test was used; for categorical variables, Chi-square test was used

**eTable 3. Supplemental Analysis: Adjusted Difference HbA1c Change for Each Care Modality Cohort by Insulin Use**

| Clinical Characteristic                    | Difference in Estimated HbA1c change at 12-months <sup>a</sup><br>(95% CI) | P value | Difference in Estimated HbA1c change at 24-months <sup>a</sup><br>(95% CI) | P-value |
|--------------------------------------------|----------------------------------------------------------------------------|---------|----------------------------------------------------------------------------|---------|
| <b>No insulin (n=1,476)</b>                |                                                                            |         |                                                                            |         |
| Mixed vs. telemedicine only                | -0.09 (-0.36, 0.17)                                                        | 0.990   | -0.03 (-0.41, 0.34)                                                        | >0.999  |
| Office vs telemedicine only                | -0.22 (-0.53, 0.09)                                                        | 0.324   | -0.11 (-0.52, 0.31)                                                        | >0.999  |
| <b>Basal insulin only (n=652)</b>          |                                                                            |         |                                                                            |         |
| Mixed vs. telemedicine only                | -0.15 (-0.45, 0.15)                                                        | 0.652   | -0.34 (-0.78, 0.09)                                                        | 0.250   |
| Office vs telemedicine only                | -0.23 (-0.58, 0.12)                                                        | 0.382   | -0.36 (-0.85, 0.13)                                                        | 0.297   |
| <b>Multiple daily injections (n=1,650)</b> |                                                                            |         |                                                                            |         |
| Mixed vs. telemedicine only                | -0.24 (-0.51, 0.02)                                                        | 0.146   | -0.03 (-0.39, 0.33)                                                        | >0.999  |
| Office vs telemedicine only                | -0.47 (-0.78, -0.15)                                                       | 0.007   | -0.19 (-0.60, 0.22)                                                        | 0.734   |

- a. Adjusted differences in HbA1c change are model-based estimates of the difference in HbA1c change from baseline between each category compared to the reference group, as indicated. These model-based estimates were obtained from linear mixed modeling of repeated measures of HbA1c adjusted for patient age, gender, race, ethnicity, social deprivation index, rurality, baseline HbA1c, and BMI; patients were nested within providers
