# Supplementary material for: Patterns of Telemedicine Use and Glycemic Outcomes of Endocrinology Care for Patients With Type 2 Diabetes
Source: PubMed Central journal article supplement (PMC10701613; doi:10.1001/jamanetworkopen.2023.46305), 2023-12-06
Supplement: jamanetwopen-e2346305-s002.pdf [file jamanetwopen-e2346305-s002.pdf]

## Data Sharing Statement

Zupa. Patterns of Telemedicine Use and Glycemic Outcomes of Endocrinology Care for Patients With Type 2 Diabetes. *JAMA Netw Open*. Published December 06, 2023.  
doi:10.1001/jamanetworkopen.2023.46305

### Data

**Data available:** No

### Additional Information

**Explanation for why data not available:** The data used in this study include potentially identifying patient information including dates and zip codes, and thus are not available in their entirety. A limited dataset is available from the authors upon reasonable request and with permission of relevant institutional review boards.
